# Supplementary material for: Haematococcus lacustris: the makings of a giant-sized chloroplast genome
Source: PubMed Central journal article supplement (PMC6205361; doi:10.1093/aobpla/ply058), 2018-10-01
Supplement: ply058_suppl_figure_s1.pdf [file ply058_suppl_figure_s1.pdf]

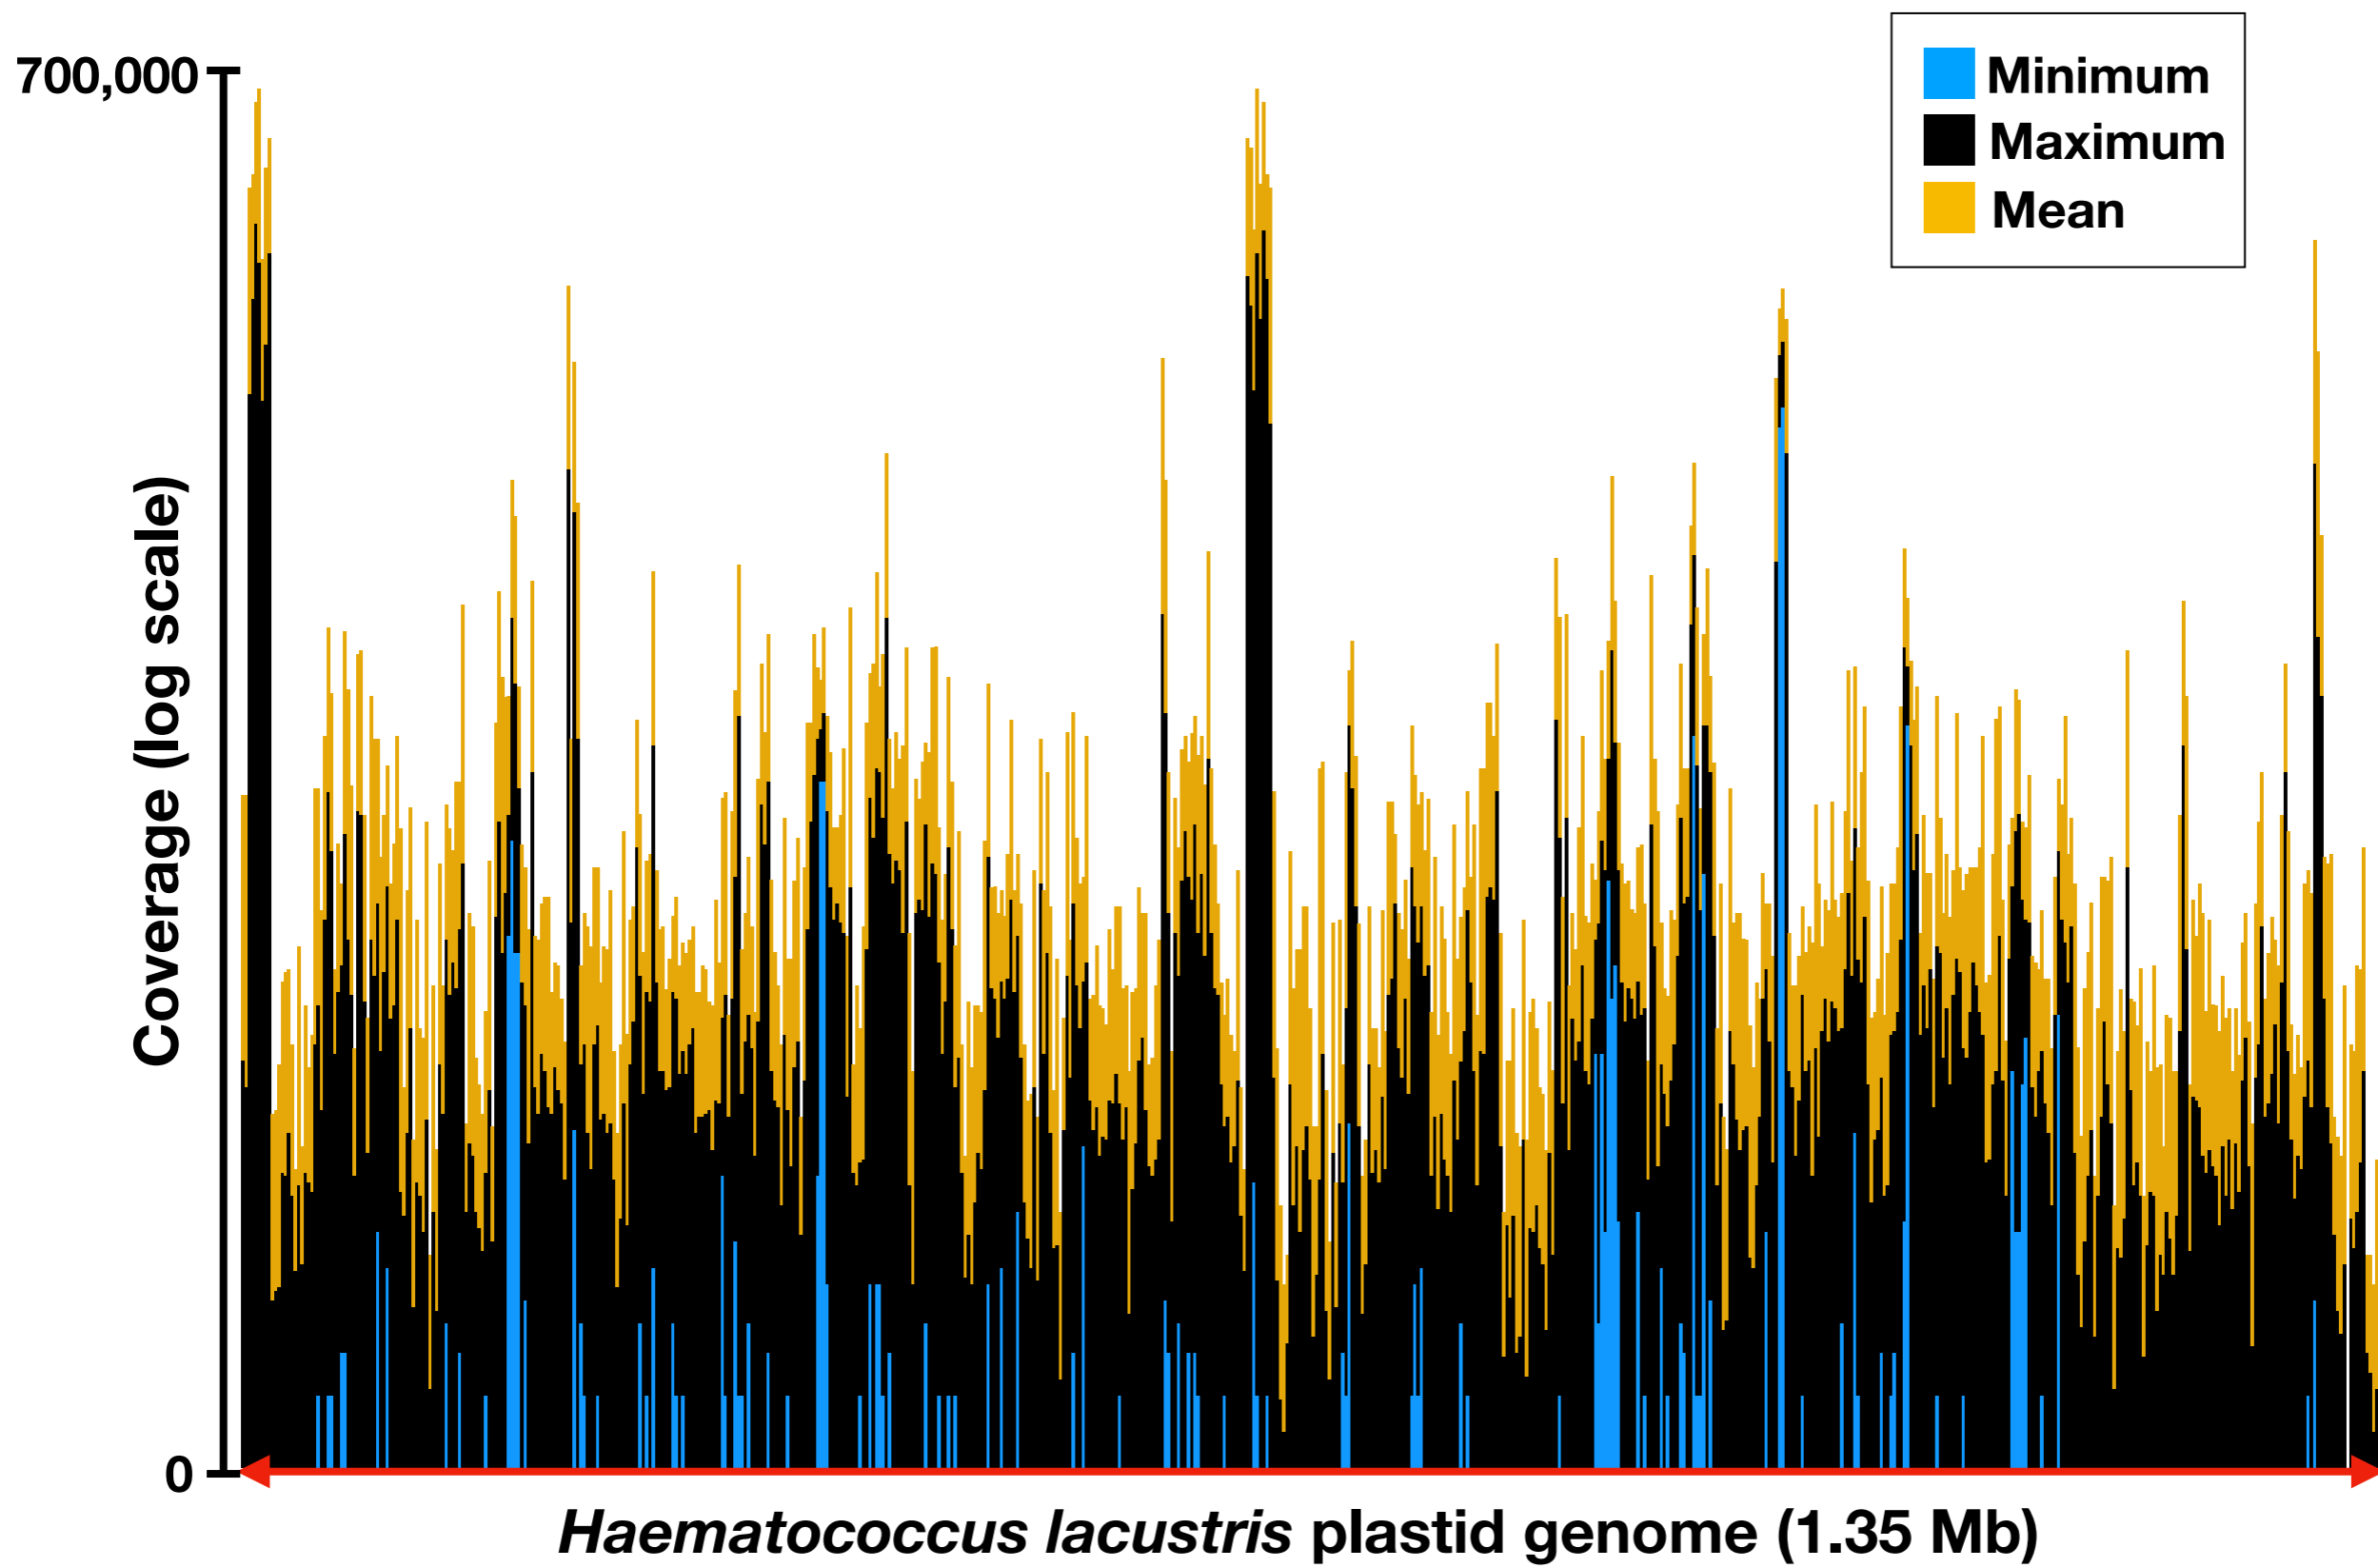

**Figure S1.** Log-scale RNA-seq coverage of the *Haematococcus lacustris* plastid genome:  $\log(\text{coverage} + 1) / \log(\text{maximum coverage} + 1)$ .
